# Supplementary material for: Free-standing NiV2S4nanosheet arrays on a 3D Ni framework via an anion exchange reaction as a novel electrode for asymmetric supercapacitor applications
Source: Royal Society of Chemistry journal article supplement (doi:10.1039/c6ta07171f), 2016-01-01
Supplement: c6ta07171f1.pdf [file c6ta07171f1.pdf]

Supporting Information

**Free-standing NiV<sub>2</sub>S<sub>4</sub> nanosheet arrays on 3D Ni framework via anion exchange  
reaction as a novel electrode for asymmetric supercapacitor applications**

Rudra Kumar, Prabhakar Rai\*, Ashutosh Sharma\*

Department of Chemical Engineering, Indian Institute of Technology Kanpur, Kanpur

208016, India

\*E-mail: prkrai@iitk.ac.in, ashutos@iitk.ac.in

**Figure S1.** SEM, elemental mapping, and EDX spectrum of Ni<sub>3</sub>(VO<sub>4</sub>)<sub>2</sub> nanosheet arrays.

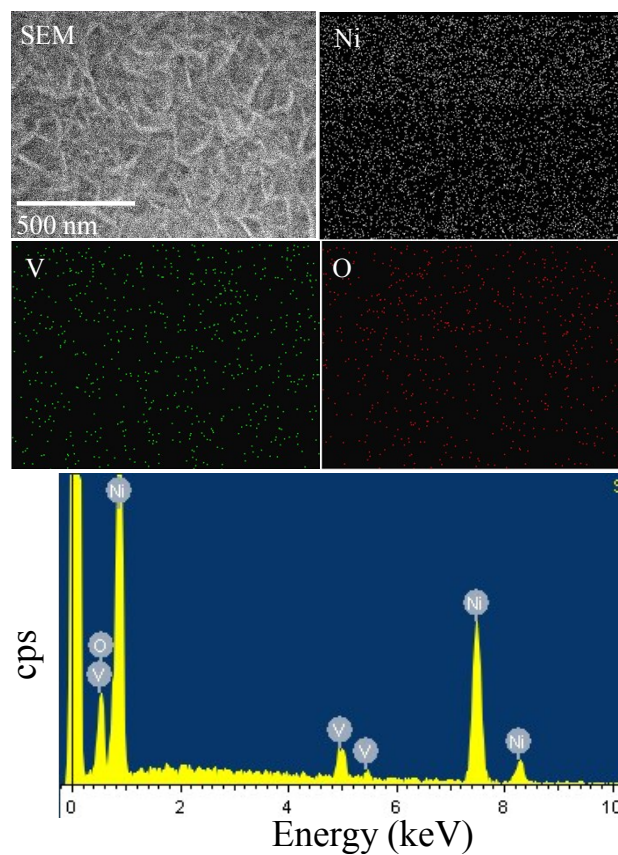

**Figure S2.** SEM, elemental mapping, and EDX spectrum of NiV<sub>2</sub>S<sub>4</sub> nanosheet arrays.

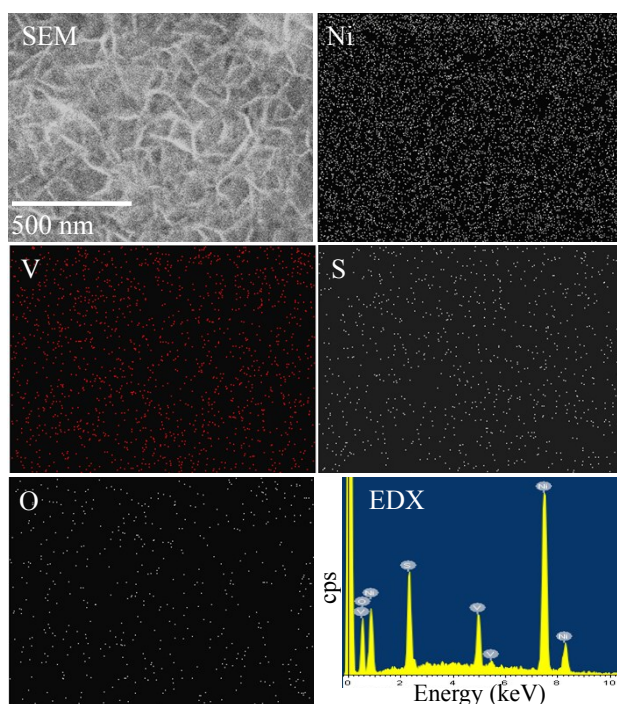

**Figure S3.** XRD profile of as synthesized NiV<sub>2</sub>S<sub>4</sub> nanosheet arrays along with curve from standard PDF card.

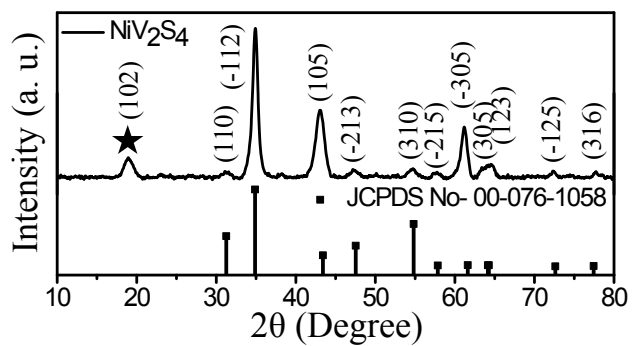

**Figure S4.** XPS spectra of  $\text{Ni}_3(\text{VO}_4)_2$  nanosheet arrays; a) survey, b) Ni, c) V and d) O.

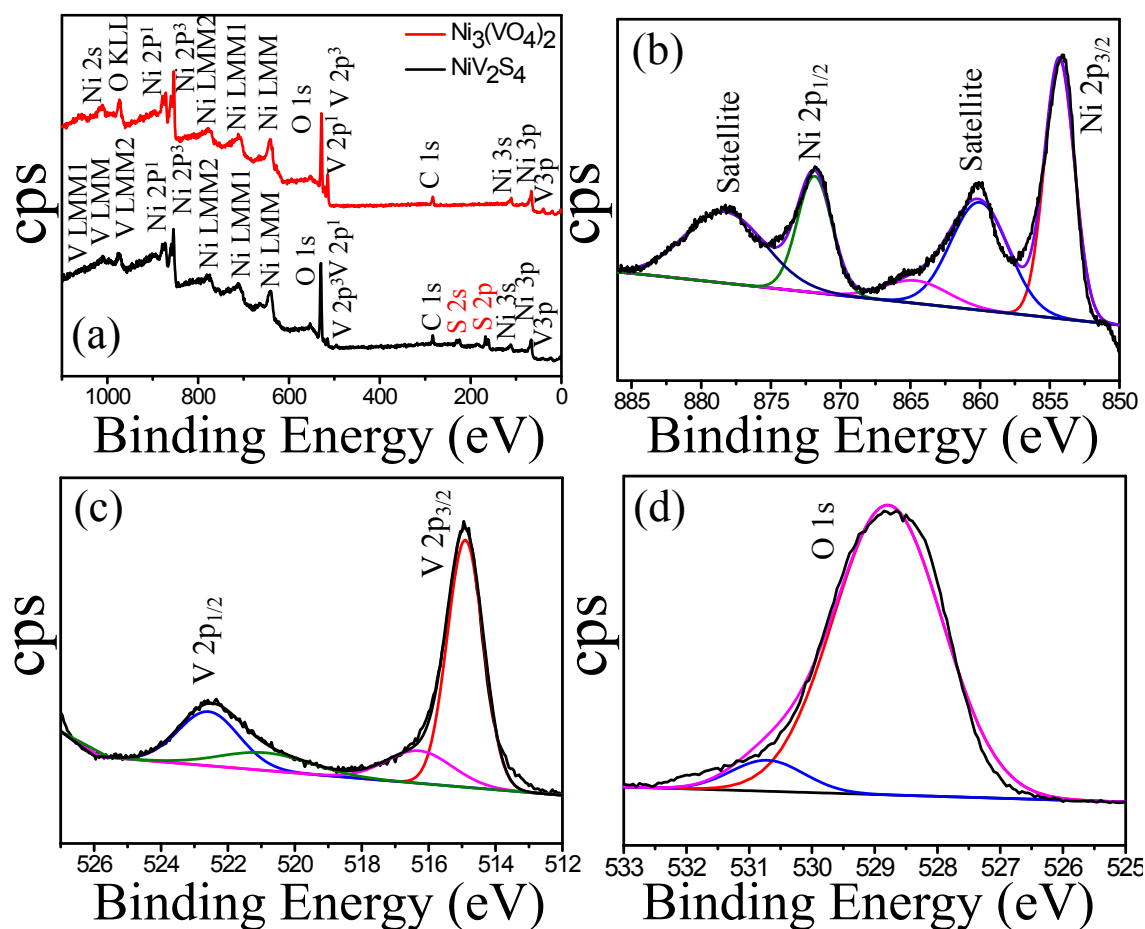

**Figure S5.** BET surface area and pore size distribution of (a)  $\text{Ni}_3(\text{VO}_4)_2$  and (b)  $\text{NiV}_2\text{S}_4$  nanosheet arrays.

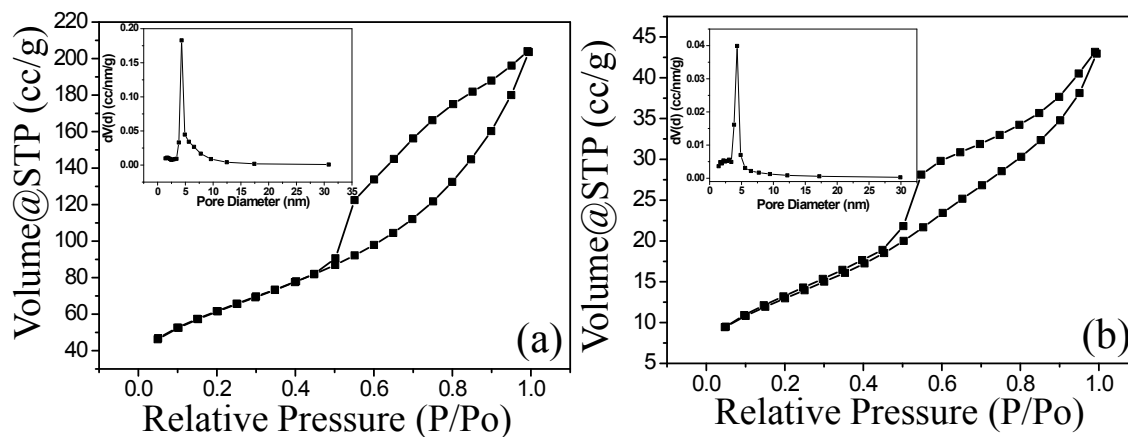

**Figure S6.** (a) CV and (b) GCD curve of  $\text{Ni}_3(\text{VO}_4)_2$  nanosheet arrays.

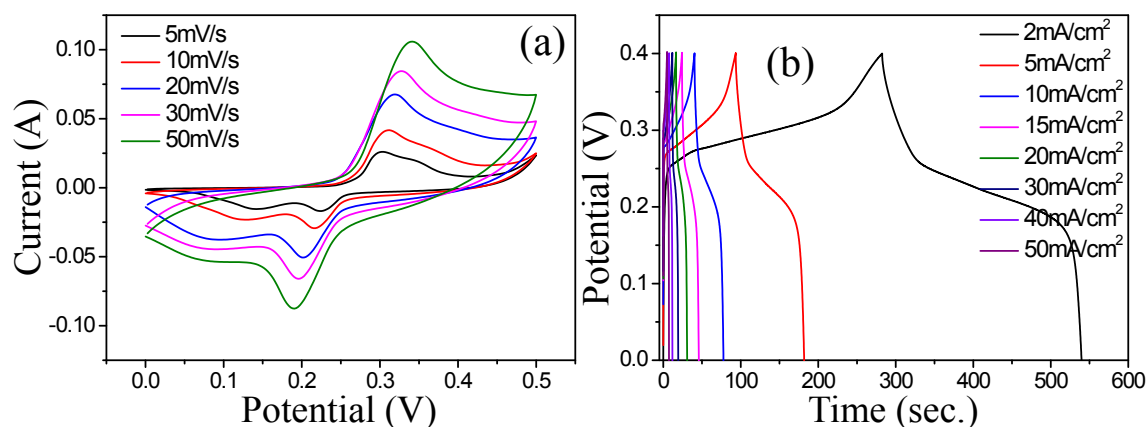

**Figure S7.** GCD curve of  $\text{Ni}_3(\text{VO}_4)_2$  nanosheet arrays synthesized at different times.

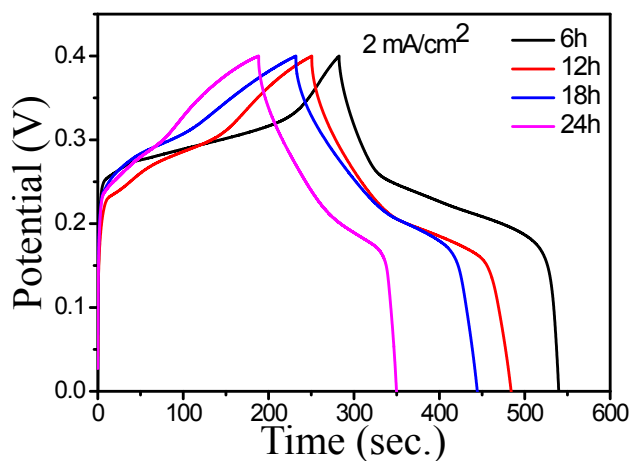

**Figure S8.** (a) Nyquist plot (inset shows high frequency region) and (b) I-V curve measurement of  $\text{NiV}_2\text{S}_4$  and  $\text{Ni}_3(\text{VO}_4)_2$  nanosheet arrays.

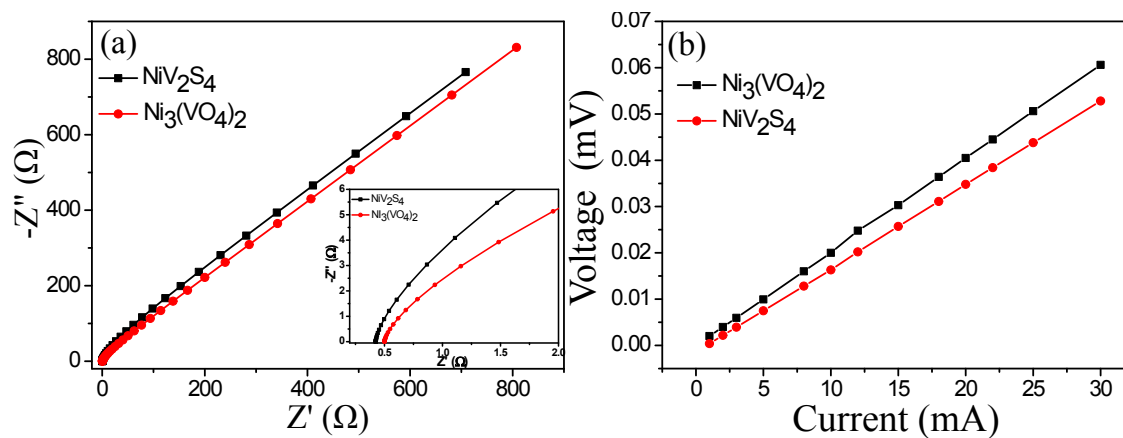

**Figure S9.** Long term cycling stability of NiV<sub>2</sub>S<sub>4</sub> nanosheet array at 50 mVs<sup>-1</sup>.

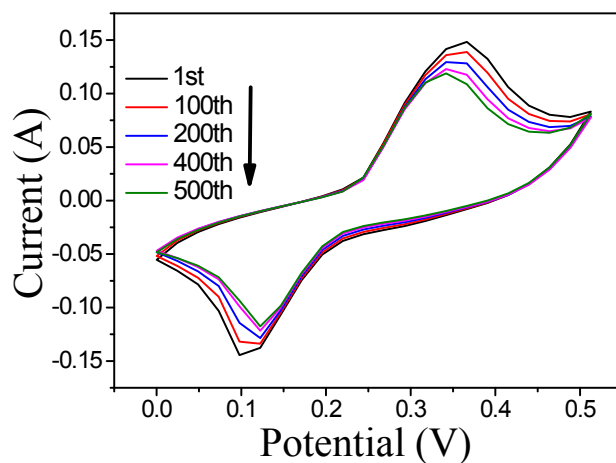

**Figure S10.** Rate capability of NiV<sub>2</sub>S<sub>4</sub> nanosheet array.

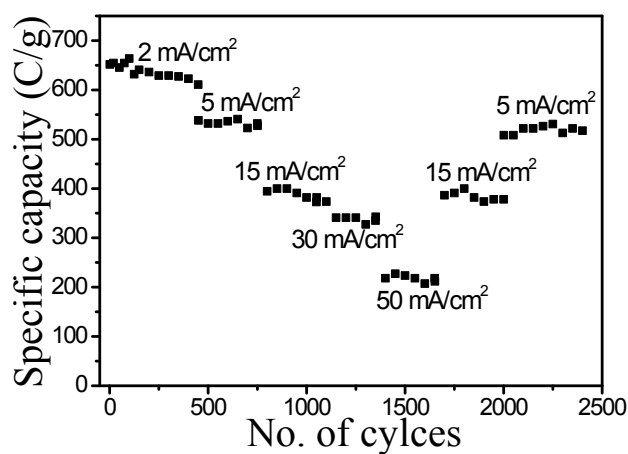

**Figure S11.** Cycling performance of Ni<sub>3</sub>(VO<sub>4</sub>)<sub>2</sub> nanosheet array at (a) 10 mAcm<sup>-2</sup> current density for 2000 cycles and (b) 5 mA.cm<sup>-2</sup> for 500 cycles .

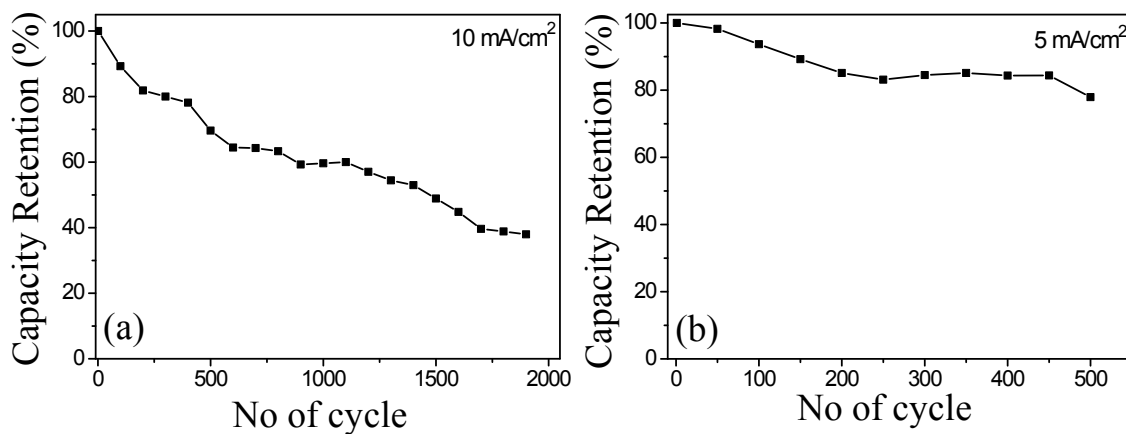

**Figure S12.** SEM images of (a)  $\text{Ni}_3(\text{VO}_4)_2$ , (b)  $\text{NiV}_2\text{S}_4$ , and (c) EIS of  $\text{NiV}_2\text{S}_4$  after cycling performance at  $10 \text{ mAcm}^{-2}$  and  $30 \text{ mAcm}^{-2}$  current density, respectively for 2000 cycles.

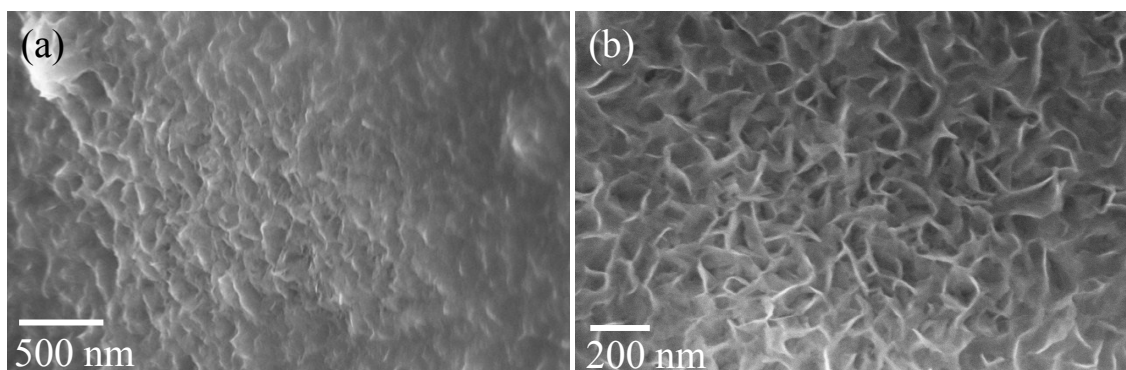

**Figure S13.** EIS of  $\text{NiV}_2\text{S}_4$  after cycling performance at  $30 \text{ mAcm}^{-2}$  current density for 2000 cycles.

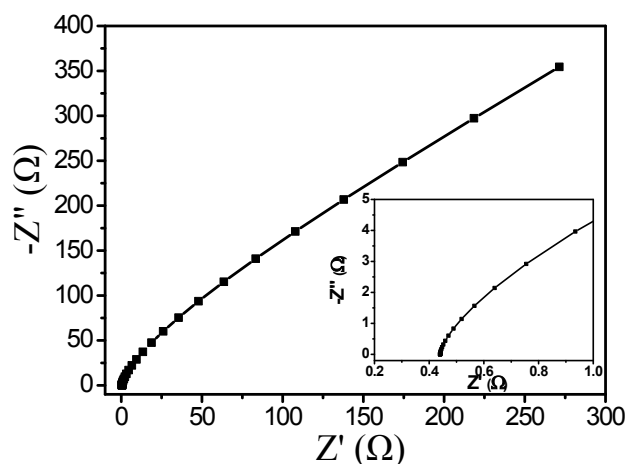

**Figure S14.** (a) CV curves at different scan rates ( $5\text{--}50 \text{ mVs}^{-1}$ ), (b) GCD curves at different current densities ( $1\text{--}5 \text{ Ag}^{-1}$ ) and (c) Variation of specific capacity with respect to different current densities for AC.

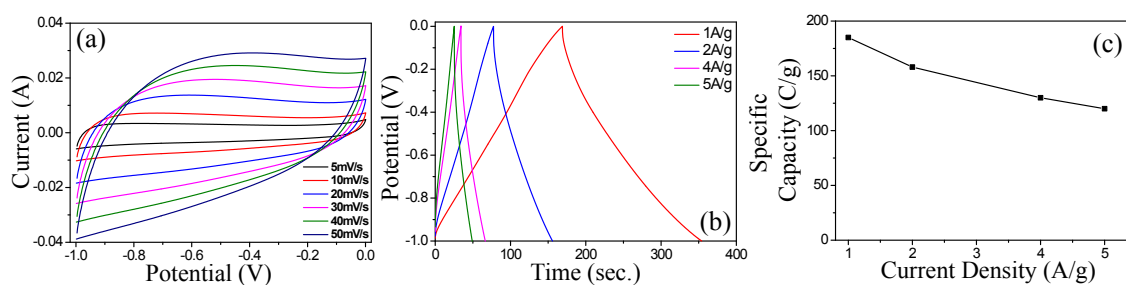

**Figure S15:** CV of NiV<sub>2</sub>S<sub>4</sub>//AC asymmetric supercapacitor at 10 mVs<sup>-1</sup> at different potential window (1- 1.6 V).

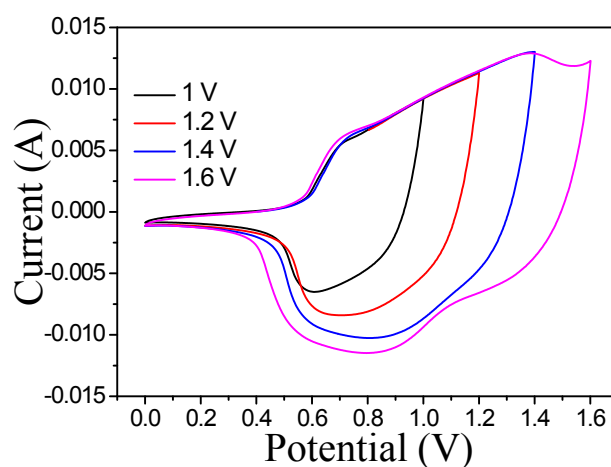

**Table S1.** Comparative study of different asymmetric supercapacitor performance reported in literature with respect to our electrode.

| Asymmetric Supercapacitor                                                                      | Voltage (V) | Energy Density (Whkg <sup>-1</sup> ) | Power Density (Wkg <sup>-1</sup> ) | Cyclic Stability | Ref No |
|------------------------------------------------------------------------------------------------|-------------|--------------------------------------|------------------------------------|------------------|--------|
| Ni-Co-S nanosheet arrays//graphene                                                             | 1.8         | 60                                   | 1800                               | 90.1% (10,000)   | 1      |
| NiCo <sub>2</sub> S <sub>4</sub> nanotube arrays/Ni foam//RGO                                  | 1.6         | 16.6                                 | 2350                               | 92% (5000)       | 2      |
| Ni <sub>3</sub> (VO <sub>4</sub> ) <sub>2</sub> //AC                                           | 1.6         | 25.3                                 | 240                                | 92% (1000)       | 3      |
| 3D Ni <sub>3</sub> S <sub>2</sub> nanosheet arrays on Ni foam//AC                              | 1.6         | 34.6                                 | 150.4                              | 85.7 % (1000)    | 4      |
| NiCo <sub>2</sub> S <sub>4</sub> @Ni <sub>3</sub> V <sub>2</sub> O <sub>8</sub> on Ni foam//AC | 1.6         | 42.7                                 | 200                                | 90% (5000)       | 5      |
| NiCo <sub>2</sub> S <sub>4</sub> //AC                                                          | 1.5         | 28.3                                 | 245                                | 91.7% (5000)     | 6      |

|                                                                                            |     |       |       |               |           |
|--------------------------------------------------------------------------------------------|-----|-------|-------|---------------|-----------|
| Ni(OH) <sub>2</sub> /graphene//graphene                                                    | 1.6 | 77.8  | 175   | 94%(3000)     | 7         |
| Co <sub>9</sub> S <sub>8</sub> nanoflakes//AC                                              | 1.6 | 31.4  | 200   | 90% (5000)    | 8         |
| Core-shell NiCo <sub>2</sub> S <sub>4</sub> //C                                            | 1.6 | 22.8  | 160   |               | 9         |
| Hollow hetero Ni <sub>7</sub> S <sub>6</sub> /Co <sub>3</sub> S <sub>4</sub> nanoboxes//AC | 1.5 | 31    | 180   | 86% (5000)    | 10        |
| rGO-Ni <sub>3</sub> S <sub>2</sub> //AC                                                    | 1.6 | 37.19 | 399.9 | 85.6% (5000)  | 11        |
| Ni@rGO-Co <sub>3</sub> S <sub>4</sub> //<br>Ni@rGO-Ni <sub>3</sub> S <sub>2</sub>          | 1.3 | 55.16 | 965   | 96.2 % (3000) | 12        |
| Capsule-like porous hollow<br>Ni <sub>1.77</sub> Co <sub>1.23</sub> S <sub>4</sub> // AC   | 1.6 | 42.7  | 190.8 |               | 13        |
| Ni-Co sulphide nanowires//AC                                                               | 1.8 | 25    | 447   | 73.1% (3000)  | 14        |
| NiV <sub>2</sub> S <sub>4</sub> //AC                                                       | 1.6 | 45.2  | 240   | 90.7% (1000)  | This Work |

## References

1. W. Chen, C. Xia and H. N. Alshareef, *ACS Nano*, 2014, **8**, 9531-9541.
2. H. Chen, J. Jiang, L. Zhang, D. Xia, Y. Zhao, D. Guo, T. Qi and H. Wan, *J. Power Sources*, 2014, **254**, 249-257.
3. R. Kumar, P. Rai and A. Sharma, *J. Mater. Chem. A*, 2016, **4**, 9822-9831.
4. H. Huo, Y. Zhao and C. Xu, *J. Mater. Chem. A*, 2014, **2**, 15111-15117.
5. L. Niu, Y. Wang, F. Ruan, C. Shen, S. Shan, M. Xu, Z. Sun, C. Li, X. Liu and Y. Gong, *J. Mater. Chem. A*, 2016, **4**, 5669-5677.
6. Y. Zhu, Z. Wu, M. Jing, X. Yang, W. Song and X. Ji, *J. Power Sources*, 2015, **273**, 584-590.
7. J. Yan, Q. Wang, T. Wei and Z. C. Fan, *Adv. Energy Mater.*, 2014, **4**, 1300816.
8. R. B. Rakhi, N. A. Alhebshi, D. H. Anjum and H. N. Alshareef, *J. Mater. Chem. A*, 2014, **2**, 16190-16198.



9. W. Kong, C. Lu, W. Zhang, J. Pu and Z. Wang, *J. Mater. Chem. A*, 2015, **3**, 12452-12460.
10. H. Hua, S. Liu, Z. Chen, R. Bao, Y. Shi, L. Hou, G. Pang, K. N. Hui, X. Zhang and C. Yuan, *Sci. Rep.*, 2016, **6**, 20973.
11. H. Lin, F. Liu, X. Wang, Y. Ai, Z. Yao, L. Chu, S. Han and X. Zhuang, *Electrochim. Acta*, 2016, **191**, 705-715.
12. D. Ghosh and C. K. Das, *ACS Appl. Mater. Interface*, 2015, **7**, 1122-1131.
13. Y. Tang, S. Chen, S. Mu, T. Chen, Y. Qiao, S. Yu and F. Gao, *ACS Appl. Mater. Interface*, 2016, **8**, 9721-9732.
14. Y. Li, L. Cao, L. Qiao, M. Zhou, Y. Yang, P. Xiao and Y. Zhang, *J. Mater. Chem. A*, 2014, **2**, 6540-6548.
